# Supplementary material
Source: PubMed Central journal article supplement (PMC3203700)
Supplement: cr201136x1.pdf [file cr201136x1.pdf]

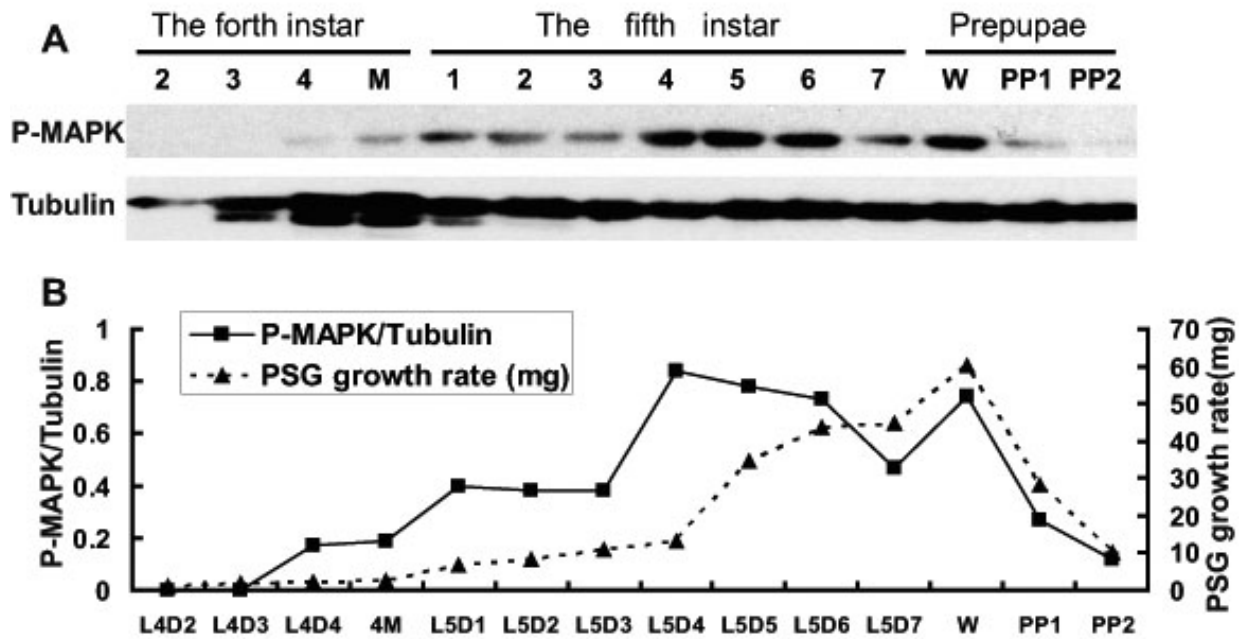

**Supplementary information, Figure S1** MAPK phosphorylation level correlates and slightly precedes the growth rate of posterior silk gland.

(A) The developmental pattern of MAPK phosphorylation level in the posterior silk gland from day 2 of the 4<sup>th</sup> instar to the prepupal stage. Tubulin is used as a loading control.

(B) The developmental pattern of MAPK phosphorylation level correlates and slightly precedes the growth rate of posterior silk gland (PSG).
