# Supplementary material
Source: PubMed Central journal article supplement (PMC3203700)
Supplement: cr201136x3.pdf [file cr201136x3.pdf]

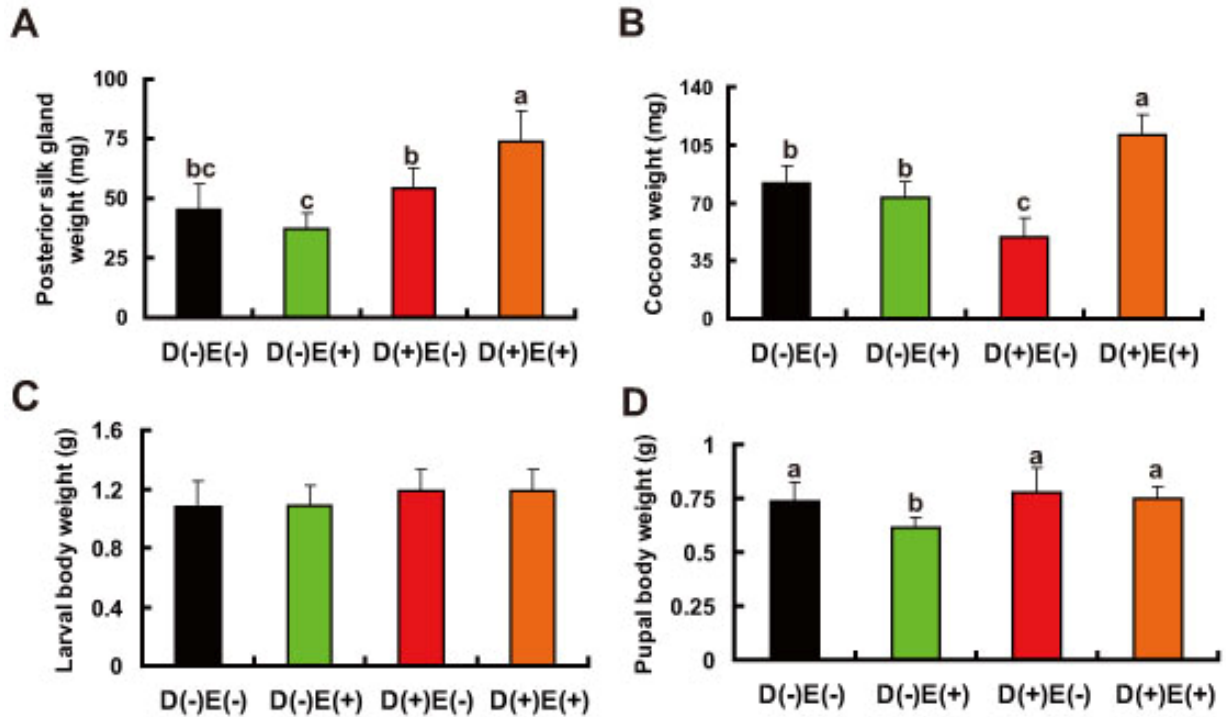

**Supplementary information, Figure S3** Increasing posterior silk gland size by *Ras1<sup>CA</sup>* overexpression greatly improves silk yield.

Three biological replicates are conducted and results from one replicate are presented. Mean  $\pm$  STEDV,  $n \geq 25$ . The bars labeled with different lowercase letters are significantly different ( $P < 0.05$ , ANOVA). Data from males are shown.

(A) In comparison with the control animals: wild type [D(-)E(-)], Fil-GAL4 [D(+E(-)], and UAS-Ras1<sup>CA</sup> [D(-)E(+)], posterior silk gland size in the transgenic silkworm Fil-GAL4/UAS-Ras1<sup>CA</sup> [D(+E(+)] is significantly increased.

(B) The cocoon weight of male [D(+E(+)] is significantly increased.

(C) The larval body weight of male [D(+E(+)] is not altered.

(D) The pupal body weight of male [D(+E(+)] is not altered.
