# Supplementary material
Source: PubMed Central journal article supplement (PMC3203700)
Supplement: cr201136x4.pdf [file cr201136x4.pdf]

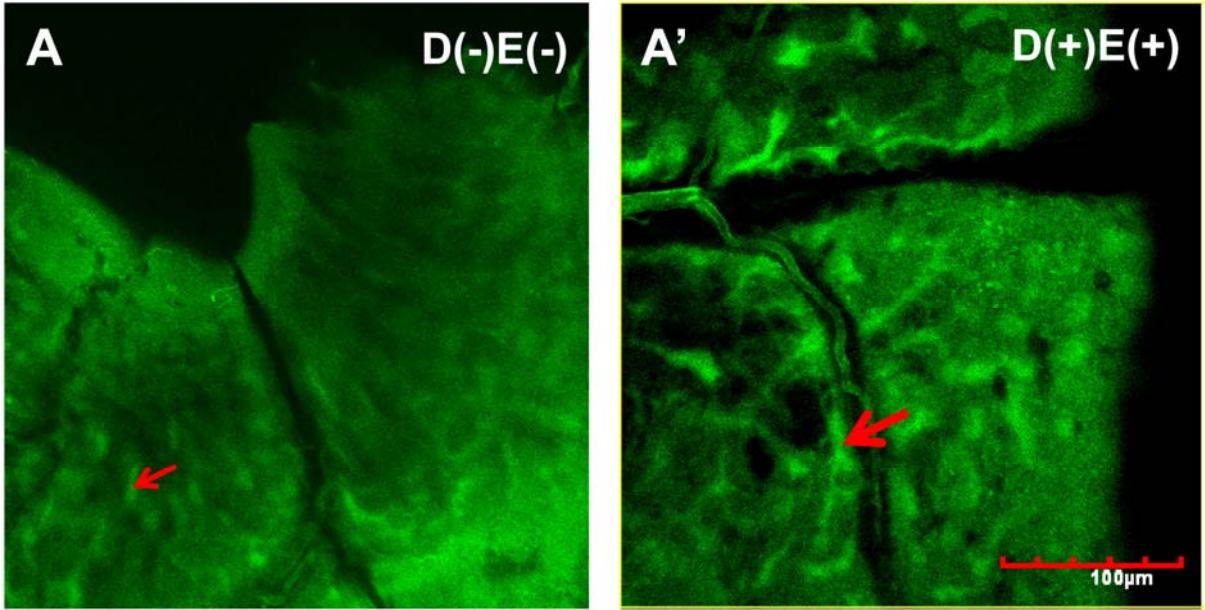

**Supplementary information, Figure S4** BrdU labeling in the posterior silk gland from [D(+)]E(+)] (A') is stronger than those in the controls [D(-)]E(-)] (A). Arrow points to the nucleolus.
