# Supplementary material
Source: PubMed Central journal article supplement (PMC3203700)
Supplement: cr201136x5.pdf [file cr201136x5.pdf]

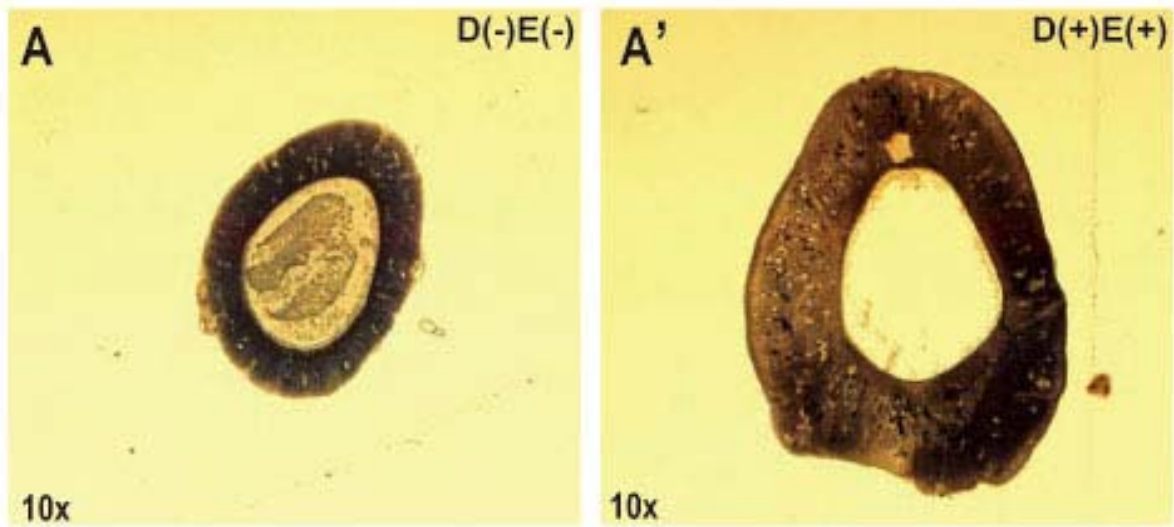

**Supplementary information, Figure S5** Ras1 activation increases the posterior silk gland size observed under optical microscopy.
