# Supplementary material
Source: PubMed Central journal article supplement (PMC3203700)
Supplement: cr201136x6.pdf [file cr201136x6.pdf]

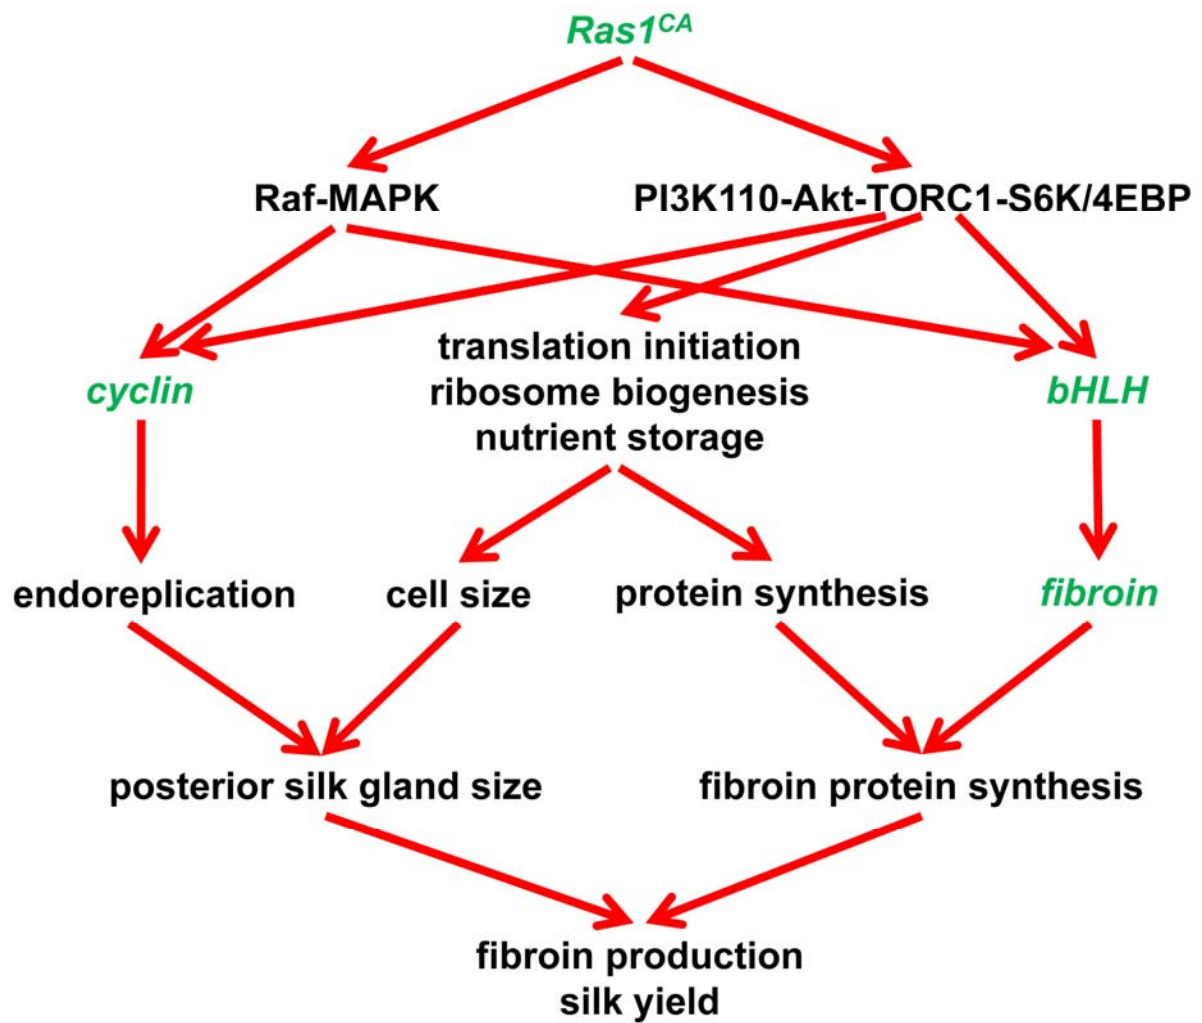

**Supplementary information, Figure S6** A proposed model shows that increasing posterior silk gland size and stimulating fibroin protein synthesis by *Ras1<sup>CA</sup>* overexpression in the transgenic silkworm Fil-GAL4/UAS-*Ras1<sup>CA</sup>*.
